# Supplementary material for: Somatostatin and Its Receptors in Myocardial Ischemia/Reperfusion Injury and Cardioprotection
Source: Front Pharmacol. 2021 Nov 5;12:663655. doi: 10.3389/fphar.2021.663655 (PMC8602362; doi:10.3389/fphar.2021.663655)
Supplement: Supplementary file 2 [file Table1.xlsx]

## Sheet: GO analysis RIC vs. IR
Analysis Type:	PANTHER Overrepresentation Test (Released 20200728)
Annotation Version and Release Date:	GO Ontology database DOI: 10,5281/zenodo,3980761 Released 2020-08-10
Analyzed List:	upload_1 (Sus scrofa)
Reference List:	Sus scrofa (all genes in database)
Test Type:	FISHER
Correction:	FDR
GO biological process complete	Sus scrofa - REFLIST (22712)	upload_1 (134)	upload_1 (expected)	upload_1 (over/under)	upload_1 (fold Enrichment)	upload_1 (raw P-value)	upload_1 (FDR)
skeletal muscle fiber development (GO:0048741)	21	4	0.12	+	32.28	1.3e-05	0.00636
regulation of myeloid cell apoptotic process (GO:0033032)	16	3	0.09	+	31.78	0.000178	0.0372
myotube cell development (GO:0014904)	24	4	0.14	+	28.25	2.08e-05	0.00817
regulation of superoxide metabolic process (GO:0090322)	19	3	0.11	+	26.76	0.00028	0.0472
regulation of cardiac muscle cell differentiation (GO:2000725)	20	3	0.12	+	25.42	0.000321	0.0473
skeletal muscle tissue regeneration (GO:0043403)	20	3	0.12	+	25.42	0.000321	0.0468
positive regulation of leukocyte apoptotic process (GO:2000108)	21	3	0.12	+	24.21	0.000365	0.0497
positive regulation of neuron death (GO:1901216)	33	4	0.19	+	20.54	6.43e-05	0.0194
myotube differentiation (GO:0014902)	46	5	0.27	+	18.42	1.22e-05	0.00639
muscle fiber development (GO:0048747)	41	4	0.24	+	16.54	0.00014	0.031
regulation of B cell proliferation (GO:0030888)	47	4	0.28	+	14.42	0.000228	0.0426
regulation of leukocyte apoptotic process (GO:2000106)	51	4	0.3	+	13.29	0.000306	0.0477
response to hydrogen peroxide (GO:0042542)	51	4	0.3	+	13.29	0.000306	0.0471
vesicle cytoskeletal trafficking (GO:0099518)	53	4	0.31	+	12.79	0.000351	0.0493
skeletal muscle tissue development (GO:0007519)	100	7	0.59	+	11.86	3.27e-06	0.00289
skeletal muscle organ development (GO:0060538)	108	7	0.64	+	10.99	5.28e-06	0.00394
regulation of reactive oxygen species metabolic process (GO:2000377)	103	6	0.61	+	9.87	4.49e-05	0.0148
regulation of neuron death (GO:1901214)	160	9	0.94	+	9.53	7.09e-07	0.00143
epidermal cell differentiation (GO:0009913)	89	5	0.53	+	9.52	0.000233	0.0428
response to reactive oxygen species (GO:0000302)	94	5	0.55	+	9.02	0.000296	0.0482
muscle organ development (GO:0007517)	174	8	1.03	+	7.79	1.23e-05	0.00624
striated muscle tissue development (GO:0014706)	211	9	1.24	+	7.23	6.23e-06	0.00368
epithelial cell differentiation (GO:0030855)	352	14	2.08	+	6.74	3.45e-08	0.000488
epithelial cell development (GO:0002064)	152	6	0.9	+	6.69	0.000345	0.0488
muscle tissue development (GO:0060537)	228	9	1.35	+	6.69	1.13e-05	0.00642
regulation of epithelial cell migration (GO:0010632)	153	6	0.9	+	6.65	0.000356	0.049
response to oxidative stress (GO:0006979)	220	8	1.3	+	6.16	6.17e-05	0.019
establishment of organelle localization (GO:0051656)	250	9	1.47	+	6.1	2.29e-05	0.00854
apoptotic signaling pathway (GO:0097190)	199	7	1.17	+	5.96	0.000219	0.0424
positive regulation of leukocyte activation (GO:0002696)	228	8	1.35	+	5.95	7.85e-05	0.0218
positive regulation of cell activation (GO:0050867)	232	8	1.37	+	5.84	8.82e-05	0.0231
regulation of epithelial cell proliferation (GO:0050678)	236	8	1.39	+	5.75	9.89e-05	0.0255
response to inorganic substance (GO:0010035)	248	8	1.46	+	5.47	0.000138	0.031
positive regulation of cell death (GO:0010942)	411	13	2.42	+	5.36	1.34e-06	0.00158
organelle localization (GO:0051640)	369	11	2.18	+	5.05	1.54e-05	0.00684
regulation of transmembrane transport (GO:0034762)	348	9	2.05	+	4.38	0.000264	0.0468
embryonic organ development (GO:0048568)	350	9	2.06	+	4.36	0.000275	0.047
leukocyte activation (GO:0045321)	355	9	2.09	+	4.3	0.000305	0.0485
regulation of protein transport (GO:0051223)	361	9	2.13	+	4.23	0.000343	0.0491
regulation of secretion (GO:0051046)	458	11	2.7	+	4.07	0.000103	0.0253
response to organic cyclic compound (GO:0014070)	419	10	2.47	+	4.05	0.000226	0.0427
tube morphogenesis (GO:0035239)	444	10	2.62	+	3.82	0.000354	0.0492
positive regulation of transport (GO:0051050)	540	12	3.19	+	3.77	0.000102	0.0259
response to organonitrogen compound (GO:0010243)	542	12	3.2	+	3.75	0.000106	0.0254
response to abiotic stimulus (GO:0009628)	594	13	3.5	+	3.71	6.06e-05	0.0191
epithelium development (GO:0060429)	695	15	4.1	+	3.66	1.87e-05	0.00758
regulation of protein localization (GO:0032880)	603	13	3.56	+	3.65	7.03e-05	0.0203
negative regulation of multicellular organismal process (GO:0051241)	801	17	4.73	+	3.6	6.2e-06	0.00382
tissue development (GO:0009888)	1151	24	6.79	+	3.53	8.2e-08	0.000581
response to nitrogen compound (GO:1901698)	627	13	3.7	+	3.51	0.000103	0.0256
regulation of cellular localization (GO:0060341)	631	13	3.72	+	3.49	0.00011	0.0259
regulation of cell death (GO:0010941)	1037	21	6.12	+	3.43	9.37e-07	0.00166
circulatory system development (GO:0072359)	596	12	3.52	+	3.41	0.00025	0.0448
regulation of transport (GO:0051049)	1146	23	6.76	+	3.4	3.08e-07	0.00109
regulation of anatomical structure morphogenesis (GO:0022603)	700	14	4.13	+	3.39	8.04e-05	0.0215
regulation of cell migration (GO:0030334)	611	12	3.6	+	3.33	0.000311	0.0474
cellular response to endogenous stimulus (GO:0071495)	726	14	4.28	+	3.27	0.000117	0.0272
regulation of locomotion (GO:0040012)	685	13	4.04	+	3.22	0.000241	0.0438
cellular lipid metabolic process (GO:0044255)	696	13	4.11	+	3.17	0.00028	0.0467
movement of cell or subcellular component (GO:0006928)	1075	20	6.34	+	3.15	6.12e-06	0.00394
regulation of cellular component movement (GO:0051270)	701	13	4.14	+	3.14	0.0003	0.0483
vesicle-mediated transport (GO:0016192)	920	17	5.43	+	3.13	3.54e-05	0.0122
regulation of hydrolase activity (GO:0051336)	928	17	5.48	+	3.1	3.94e-05	0.0133
negative regulation of protein metabolic process (GO:0051248)	825	15	4.87	+	3.08	0.000125	0.0286
response to oxygen-containing compound (GO:1901700)	840	15	4.96	+	3.03	0.000152	0.0331
regulation of apoptotic process (GO:0042981)	952	17	5.62	+	3.03	5.37e-05	0.0173
regulation of programmed cell death (GO:0043067)	969	17	5.72	+	2.97	6.65e-05	0.0196
response to endogenous stimulus (GO:0009719)	805	14	4.75	+	2.95	0.000331	0.0479
lipid metabolic process (GO:0006629)	863	15	5.09	+	2.95	0.000203	0.041
homeostatic process (GO:0042592)	1177	20	6.94	+	2.88	2.23e-05	0.00856
locomotion (GO:0040011)	887	15	5.23	+	2.87	0.00027	0.0467
regulation of localization (GO:0032879)	1886	31	11.13	+	2.79	1.61e-07	0.000763
cellular localization (GO:0051641)	1747	27	10.31	+	2.62	3.81e-06	0.00317
establishment of localization in cell (GO:0051649)	1254	19	7.4	+	2.57	0.000162	0.0343
small molecule metabolic process (GO:0044281)	1197	18	7.06	+	2.55	0.000268	0.0469
response to stress (GO:0006950)	2094	31	12.35	+	2.51	1.51e-06	0.00164
regulation of multicellular organismal process (GO:0051239)	2143	31	12.64	+	2.45	3.89e-06	0.00306
immune system process (GO:0002376)	1383	20	8.16	+	2.45	0.000198	0.0407
negative regulation of gene expression (GO:0010629)	1386	20	8.18	+	2.45	0.000204	0.0407
regulation of multicellular organismal development (GO:2000026)	1394	20	8.22	+	2.43	0.00022	0.0421
negative regulation of nitrogen compound metabolic process (GO:0051172)	1818	26	10.73	+	2.42	3.51e-05	0.0124
negative regulation of macromolecule metabolic process (GO:0010605)	2058	29	12.14	+	2.39	1.17e-05	0.0064
negative regulation of metabolic process (GO:0009892)	2225	31	13.13	+	2.36	6.09e-06	0.00411
cellular response to chemical stimulus (GO:0070887)	1810	25	10.68	+	2.34	7.22e-05	0.0205
regulation of cellular component organization (GO:0051128)	1669	23	9.85	+	2.34	0.000159	0.0341
animal organ development (GO:0048513)	2110	29	12.45	+	2.33	1.65e-05	0.00688
macromolecule localization (GO:0033036)	1648	22	9.72	+	2.26	0.000319	0.0475
regulation of biological quality (GO:0065008)	2849	38	16.81	+	2.26	1.19e-06	0.00187
negative regulation of cellular metabolic process (GO:0031324)	1952	26	11.52	+	2.26	7.98e-05	0.0218
regulation of response to stimulus (GO:0048583)	2751	35	16.23	+	2.16	1.31e-05	0.00621
negative regulation of cellular process (GO:0048523)	3478	44	20.52	+	2.14	4.38e-07	0.00103
establishment of localization (GO:0051234)	3060	38	18.05	+	2.1	5.89e-06	0.00417
negative regulation of biological process (GO:0048519)	3829	47	22.59	+	2.08	3.59e-07	0.00102
transport (GO:0006810)	2947	36	17.39	+	2.07	1.58e-05	0.0068
localization (GO:0051179)	4017	47	23.7	+	1.98	1.97e-06	0.00199
positive regulation of metabolic process (GO:0009893)	2826	32	16.67	+	1.92	0.000314	0.0473
regulation of cellular metabolic process (GO:0031323)	4820	50	28.44	+	1.76	2.78e-05	0.0101
regulation of metabolic process (GO:0019222)	5311	54	31.33	+	1.72	1.39e-05	0.00633
positive regulation of biological process (GO:0048518)	4446	44	26.23	+	1.68	0.000282	0.0465
regulation of macromolecule metabolic process (GO:0060255)	4945	48	29.18	+	1.65	0.000211	0.0414
organic substance metabolic process (GO:0071704)	6305	57	37.2	+	1.53	0.000306	0.0482
cellular process (GO:0009987)	13595	106	80.21	+	1.32	3.22e-06	0.00304
biological_process (GO:0008150)	16080	119	94.87	+	1.25	1.23e-06	0.00174
Unclassified (UNCLASSIFIED)	6632	15	39.13	-	0.38	1.23e-06	0.00158
